# Supplementary material
Source: PubMed Central journal article supplement (PMC141036)
Supplement: pnas_0233733100_1.pdf [file pnas_0233733100_1.pdf]

**Table 2. References for the density parameter used in model showing a typical range of values**

| Species                     | Habitat                      | Location         | Density, no. per hectare | Ref.  |
|-----------------------------|------------------------------|------------------|--------------------------|-------|
| <i>Blarina brevicauda</i>   | Grasslands                   | IL               | 2-50 (mean 25)           | 1     |
| <i>Blarina brevicauda</i>   | NA*                          | PA               | 2-24                     | 2     |
| <i>Blarina brevicauda</i>   | Beech/maple climax           | PA               | 120                      | 3     |
| <i>Blarina brevicauda</i>   | NA                           | NA               | 1.6-121                  | 4     |
| <i>Blarina brevicauda</i>   | Varied                       | ME               | 7                        | 5     |
| Density used:               |                              |                  | 25.00                    |       |
| <i>Didelphis virginiana</i> | NA                           | KS               | 0.123                    | 6     |
| <i>Didelphis virginiana</i> | Coastal pine/hardwood forest | TX               | 0.17-0.625               | 7     |
| <i>Didelphis virginiana</i> | NA                           | NA               | 0.2-2.5                  | 8     |
| <i>Didelphis virginiana</i> | Beech/maple climax           | PA               | 0.07-0.014               | 3     |
| <i>Didelphis virginiana</i> | NA                           | PA               | 0.1-1                    | 2     |
| <i>Didelphis virginiana</i> | Oak/hickory forest           | IL               | 0.9-2.5                  | 9, 10 |
| Density used:               |                              |                  | 1.00                     |       |
| <i>Mephitis mephitis</i>    | Beech/maple climax           | PA               | 0.22                     | 3     |
| <i>Mephitis mephitis</i>    | Most often in this range     | NA               | 0.007-0.185              | 11    |
| <i>Mephitis mephitis</i>    | Pine/hardwoods & farms       | VA               | 0.111                    | 12    |
| <i>Mephitis mephitis</i>    | NA                           | PA               | 0.01-0.09                | 2     |
| <i>Mephitis mephitis</i>    | Oak/hickory forest           | MI               | 0.22                     | 13    |
| Density used:               |                              |                  | 0.05                     |       |
| <i>Procyon lotor</i>        | Suburbs                      | OH               | 0.68                     | 14    |
| <i>Procyon lotor</i>        | River bottomlands            | IL               | 0.2                      | 15    |
| <i>Procyon lotor</i>        | Rural                        | USA <sup>†</sup> | 0.251                    | 16    |
| <i>Procyon lotor</i>        | Varied                       | NA               | 0.2-0.023                | 17    |
| <i>Procyon lotor</i>        | NA                           | PA               | 0.02 - 0.2               | 2     |
| <i>Procyon lotor</i>        | Beech/maple climax           | PA               | 0.37 - 0.45              | 3     |
| Density used:               |                              |                  | 0.20                     |       |
| <i>Sciurids</i>             | Continuous forest            | Southeast OH     | 1.4                      | 18    |
| <i>Sciurids</i>             | Continuous forest            | Southeast OH     | 3.211                    | 19    |

|                                                 |                         |                      |                  |    |
|-------------------------------------------------|-------------------------|----------------------|------------------|----|
| <i>Sciurids</i>                                 | Continuous forest       | NC                   | <3-21            | 20 |
| <i>Sciurus carolinensis</i>                     | Woodlot                 | NA                   | 6.5              | 21 |
| <i>Sciurus carolinensis</i>                     | Oak/hickory woodlot     | USA                  | 15.9             | 22 |
| <i>Sciurus carolinensis</i>                     | Oak/hickory forest      | IL                   | 3.7              | 23 |
| <i>Sciurus carolinensis</i>                     | Oak/hickory forest      | USA                  | 11.1-14.1        | 24 |
| <i>Sciurus carolinensis</i>                     | NA                      | PA                   | 5-50             | 2  |
| <i>Sciurus carolinensis</i>                     | Beech/maple climax      | PA                   | 0.07-2.4         | 3  |
| <i>Sciurus carolinensis</i>                     | Mixed deciduous forests | Canada               | 4.4              | 25 |
| <i>Sciurus carolinensis</i>                     | Oak wood                | England <sup>‡</sup> | 8.1              | 26 |
| <i>Sciurus carolinensis</i>                     | Mixed deciduous forests | USA                  | 2-16             | 26 |
| <i>Tamiasciurus hudsonicus</i>                  | "Good habitat"          | USA                  | 7-8              | 4  |
| <i>Tamiasciurus hudsonicus</i>                  | NA                      | NA                   | 0.3-2            | 26 |
| <i>Tamiasciurus hudsonicus</i>                  | Hardwoods               | US                   | 1.8-4.6          | 27 |
| Density used (red and gray squirrels combined): |                         |                      | 8.1 <sup>§</sup> |    |
| <i>Sorex</i> <sup>¶</sup>                       | NA                      | PA                   | 3-124            | 28 |
| <i>Sorex cinereus</i>                           | Varied                  | ME                   | 20.2             | 5  |
| <i>Sorex cinereus</i>                           | NA                      | PA                   | 3-25             | 29 |
| <i>S. cinereus</i> and <i>S. fumeus</i>         | Deciduous forest        | Southwest<br>PA      | 4 -19            | 29 |
| <i>Sorex fumeus</i>                             | NA                      | PA                   | 2-15             | 2  |
| <i>Sorex fumeus</i>                             | Climax forest           | NA                   | 143              | 30 |
| <i>Sorex fumeus</i>                             | "Good habitat"          | NY                   | 24               | 28 |
| <i>Sorex fumeus</i>                             | Beech forest            | NY                   | 22-35            | 28 |
| <i>Sorex fumeus</i>                             | General density         | Western NY           | 12-15            | 28 |
| <i>Sorex dispar</i>                             | NA                      | PA                   | 5                | 2  |
| Density used (all <i>Sorex</i> species) :       |                         |                      | 25.00            |    |

\*Not available

<sup>†</sup>Based on 22 studies in North America

<sup>‡</sup>Mean peak summer density over 10 years

<sup>§</sup>Due to the importance of this parameter in the model, we consulted with M. Steele, who confirmed that this was a typical moderate density for the habitat (personal communication).

<sup>¶</sup>*Sorex* shrews captured at the Institute of Ecosystem Studies may include cryptic species *Sorex cinereus*, *Sorex fumeus*, and possibly *Sorex dispar*.

1. Getz, L.L. (1989) *J. Mammal* **70**, 58-66.
2. Merritt, J. F. (1987) *Guide to the Mammals of Pennsylvania*. (University of Pittsburgh Press, Pittsburgh).
3. Williams, A. B. (1936) *Ecol. Monogr.* **6**, 318-418.
4. Wilson, D. E. & Ruff, S. (1999) *North American Mammals*. (Smithsonian Institution Press, Washington).
5. Richens, V. B. (1974) *Can. Field Nat.* **88**, 191-196.
6. Fitch, H. S. & Sandidge, L. L. (1953) *Mus. Nat. Hist.* **7**, 305-338.
7. Lay, D. W. (1942) *J. Mammal.* **23**, 147-159.
8. Whitaker, J. O., Jr. & Hamilton, W. J., Jr. (1998) *Mammals of the Eastern United States*. (Cornell University Press, Ithaca, NY).
9. Holmes, A. C. V. & Sanderson, G. C. (1965) *J. Wildl. Manage.* **29**, 287-295.
10. Sanderson, G. C. (1961) *J. Wildl. Manage.* **25**, 20-27.
11. Wade-Smith, J. & Verts, B. J. (1982) *Mammalian Species* **173**, 1-7.
12. Stout, J. & Sonenshine, D. E. (1974) *Chesapeake Sci.* **15**, 140-145.
13. Allen, D. L. & Shapton, W. W. (1932) *Ecology* **3**, 212-228.
14. Hoffman, C. O. & Gottschang, J. L. (1977) *J. Mammal.* **58**, 623-636.
15. Yeager, L. E. & Rennels, R. G. (1943) *J. Wildl. Manage.* **7**, 46-60.
16. Riley, S. P. D., Hadidian, J. & Manski, D. A. (1998) *Can. J. Zool.* **76**, 1153-1164.
17. Lotze, J. & Anderson, S. (1979) *Mammalian Species* **119**, 1-8.
18. Nixon, C. M., Edwards, W. R. & Eberhardt, L. (1967) *J. Wildl. Manage.* **31**, 96-101.

19. Nixon, C. M. & McClain, M. W. (1969) *J. Wildl. Manage.* **33**, 353-357.
20. Koprowski, J. L. (1994) *Mammalian Species* **480**, 1-9.
21. Jones, R. E. (1970) *Trans. Wildl. Soc. 27th Northeast Fish Wildl. Conf.* 97-106.
22. Montgomery, S. D., Whelan, J. B. & Mosby, J. S. (1975) *J. Wildl. Manage.* **39**, 709-717.
23. Brown, L.G. & Yeager, L. E. (1945) *Il. Nat. Hist. Surv. Bull.* **23**, 449-536.
24. Mosby, J. S. (1969) *J. Wildl. Manage.* **33**, 59-73.
25. Thompson, D.C. (1978) *Behaviour* **64**, 305-328.
26. Gurnell, J. (1987) *The Natural History of Squirrels*. (Facts on File, New York).
27. Layne, J. N. (1954) *Ecol. Monogr.* **24**, 227-267.
28. Hamilton, W. J., Jr. 1940) *Zoologica* **25**, 417-491.
29. Cawthorn, J. M. (1994) in *Advances in the Biology of Shrews*, eds. Merritt, J. F., Kirkland, G. L., Jr., & Rose R. K. (Carnegie Museum of Natural History Special Pub. No. 18, Pittsburgh), pp. 39-44.
30. Owen, J. G. (1984) *Mammalian Species* **215**, 1-8.
