# Supplementary material
Source: PubMed Central journal article supplement (PMC141036)
Supplement: pnas_0233733100_2.pdf [file pnas_0233733100_2.pdf]

**Table 3. The effect of including laboratory molting percentage on the predicted nymphal infection prevalence at the range of mouse densities from the most diverse model**

|               | Predicted nymphal infection prevalence |                            |
|---------------|----------------------------------------|----------------------------|
| Mouse density | With molting percentage                | Without molting percentage |
| 0             | 33.7                                   | 34.7                       |
| 10            | 37.1                                   | 38.6                       |
| 20            | 40                                     | 41.9                       |
| 30            | 42.5                                   | 44.7                       |
| 40            | 44.7                                   | 47.1                       |
| 50            | 46.6                                   | 49.1                       |
| 60            | 48.3                                   | 51.1                       |
| 70            | 49.9                                   | 52.5                       |
| 80            | 51.2                                   | 53.1                       |
| 90            | 52.5                                   | 55.2                       |
| 100           | 53.6                                   | 56.3                       |
